# Supplementary material for: Phase-pure M1 MoVNbTeOx/TiO2nanocomposite catalysts: high catalytic performance for oxidative dehydrogenation of ethane
Source: Royal Society of Chemistry journal article supplement (doi:10.1039/d1cy01749g), 2021-12-21
Supplement: d1cy01749g1.pdf [file d1cy01749g1.pdf]

## Supporting Information

### Phase-pure M1 MoVNbTeO<sub>x</sub>/TiO<sub>2</sub> nanocomposite catalysts: highly catalytic performance for oxidative dehydrogenation of ethane

Dan Dang,<sup>a#</sup> Yuxin Chen,<sup>b#</sup> Xin Chen,<sup>b</sup> Kai Feng,<sup>b</sup> Binhang Yan,<sup>b\*</sup> Yi Cheng<sup>b\*</sup>

<sup>a</sup> College of Chemistry, Chemical and Environmental Engineering, Henan University of Technology, Zhengzhou 450001, P.R. China

<sup>b</sup> Department of Chemical Engineering, Tsinghua University, Beijing 100084, P. R. China

#### Experimental

**Calculation of the kinetic parameters of reduction/re-oxidation.** The performance of the pulse operation of the packed bed reactor is predicted by modeling a single tube, assuming that all tubes behave almost identically in a reliable manner<sup>S1,S2</sup>. This work simulates the performance of the samples catalytic formulation during the pulse injection reaction in a single packed bed reactor in an isothermal mode. The one-dimensional axial model was used and given as Eqs. (S1-S5):

Gas phase:

Ethane pulse injection:

$$\frac{\partial p_{C_2H_6}}{\partial t} = -\frac{u}{\varepsilon_b} \frac{\partial p_{C_2H_6}}{\partial z} + D_z \frac{\partial^2 p_{C_2H_6}}{\partial z^2} - \frac{(1 - \varepsilon_b)}{\varepsilon_b} RT \rho_{cat} r_1 C_{ox} \quad (S1)$$

$$\frac{\partial p_{C_2H_4}}{\partial t} = -\frac{u}{\varepsilon_b} \frac{\partial p_{C_2H_4}}{\partial z} + D_z \frac{\partial^2 p_{C_2H_4}}{\partial z^2} + \frac{(1 - \varepsilon_b)}{\varepsilon_b} RT \rho_{cat} r_1 C_{ox} \quad (S2)$$

Oxygen pulse injection:

$$\frac{\partial p_{O_2}}{\partial t} = -\frac{u}{\varepsilon_b} \frac{\partial p_{O_2}}{\partial z} + D_z \frac{\partial^2 p_{O_2}}{\partial z^2} - \frac{(1 - \varepsilon_b)}{\varepsilon_b} RT \rho_{cat} r_o C_{red}$$

(S3)

Solid phase:

Ethane pulse injection:

$$\frac{\partial C_{red}}{\partial t} = r_1 (C_t - C_{red})$$

(S4)

Oxygen pulse injection:

$$\frac{\partial C_{ox}}{\partial t} = 2r_2 (C_t' - C_{ox})$$

(S5)

The postulated model expressions in Eqs. (S1-S5) are nonlinear. The numerical integration of the partial differential equations system was performed by using the MATLAB function ‘pedpe’. The optimization criteria were based on the fact that all the rate constants for each reaction must be positive and established on a minimum sum of squares of errors, given by Eq. (S6):

$$SSQ = \sqrt{\sum_{i=1}^N (\text{Conversion}_{i,\text{exp}} - \text{Conversion}_{i,\text{theo}})^2}$$

(S6)

The initial values of parameters were calculated by ethane conversion, inlet pressure, and lattice oxygen concentration of the first pulse. Because the conversion of ethane/oxygen was smaller than 2% after the 5<sup>th</sup> pulse, it may be related to the lattice oxygen diffusion process from the bulk phase to the surface. Then, the data of the first three pulses were used for fitting. The lattice oxygen capacity and oxygen vacancy capacity were estimated by the corresponding titration process. During ethane pulse

injection reaction, the catalyst structure may suffer from severe damage. So the lattice oxygen capacity may decrease after the ethane pulse reaction. Parameter discrimination was based on the lowest sum of square (SSQ) and the correlation coefficients ( $R^2$ ) criteria.

**Calculation of the active sites.** The active site ( $V^{5+}$ ) is calculated by Eq. (S6), which is determined by BET, XPS, and structure parameters from reference [S3]. The lattice parameter is listed in Table S1.

$$\begin{aligned} \text{Number of Active sites } (V^{5+}) &= \frac{1 \times \text{Specific surface area} \times \text{Bottom surface area} \times N_{001} \times MF_{M1}}{(1 + V^{5+}/V^{4+}) \times \text{Bottom surface area} + \text{Lateral surface area} \times A_{001}} \end{aligned} \quad (S7)$$

$N_{001}$  is the number of V atom in each ab plane,  $A_{001}$  is the area of 001 plane in the cell, and  $MF_{M1}$  is the mass fraction of M1 phase in the catalyst.

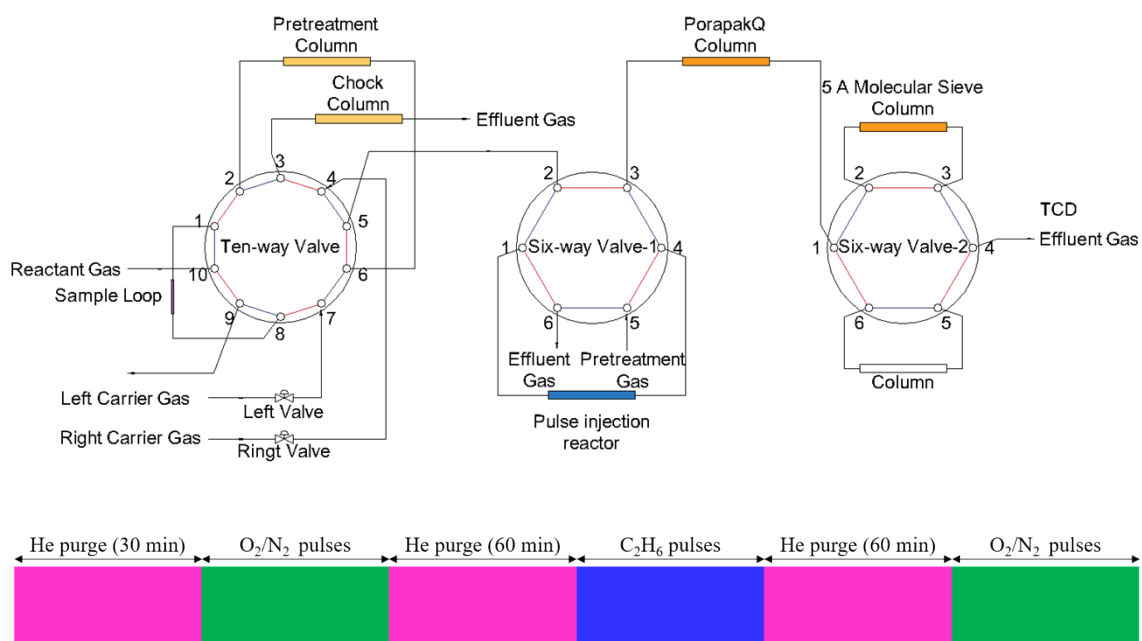

**Fig. S1** The diagram for pulse reaction experiments

**Note:** Pulses of reactant gas was introduced by a 150  $\mu$ L (6.13  $\mu$ mol) sample loop, connected with a ten-way valve. The pulse injection reactor was introduced into the on-

line GC system by the six-way valve-1.

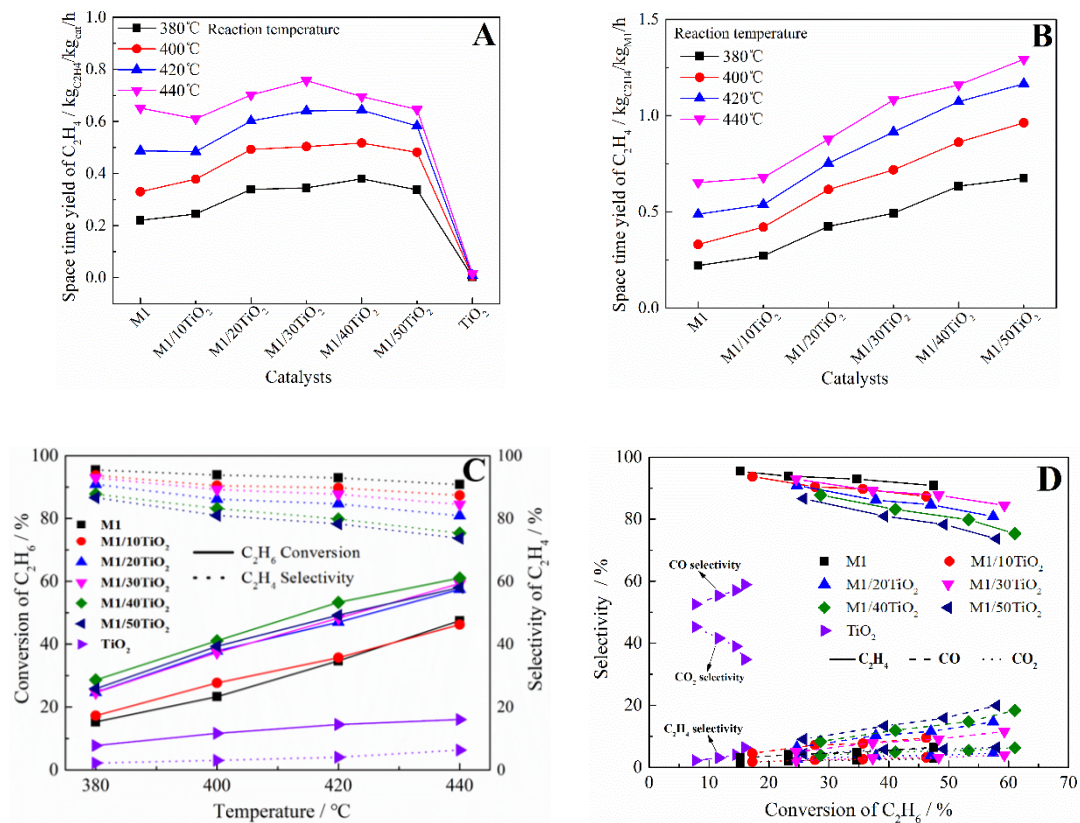

**Fig. S2** Catalytic performance of a series of M1/TiO<sub>2</sub> catalysts with different reaction temperature  
 (A) STY of M1/TiO<sub>2</sub> catalysts with different TiO<sub>2</sub> mass fractions.  
 (B) STY of M1/TiO<sub>2</sub> catalysts with different TiO<sub>2</sub> mass fractions normalized to M1.  
 (C) The conversion of C<sub>2</sub>H<sub>6</sub> as a function of the reaction temperature T.  
 (D) The selectivity of C<sub>2</sub>H<sub>4</sub> as a function of the conversion of C<sub>2</sub>H<sub>6</sub>.

Reaction condition: atmospheric pressure, contact time W/F=18.52 g<sub>cat</sub>·h/mol<sub>C<sub>2</sub>H<sub>6</sub></sub>, reaction temperature T=380-440 °C, reactants molar ratio C<sub>2</sub>H<sub>6</sub>/O<sub>2</sub>/He=30/20/50

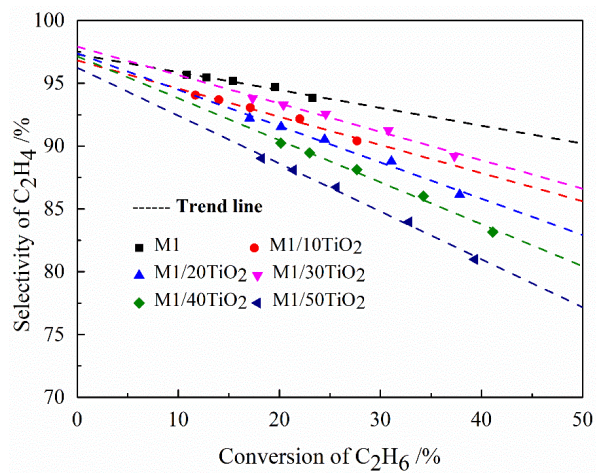

**Fig. S3** Ethane conversion vs. selectivity and trend line of M1, M1/10~50TiO<sub>2</sub> at a reaction temperature of 400 °C , C<sub>2</sub>H<sub>6</sub>/O<sub>2</sub>/He molar ratio of 30/20/50 at the reactor inlet, ambient pressure

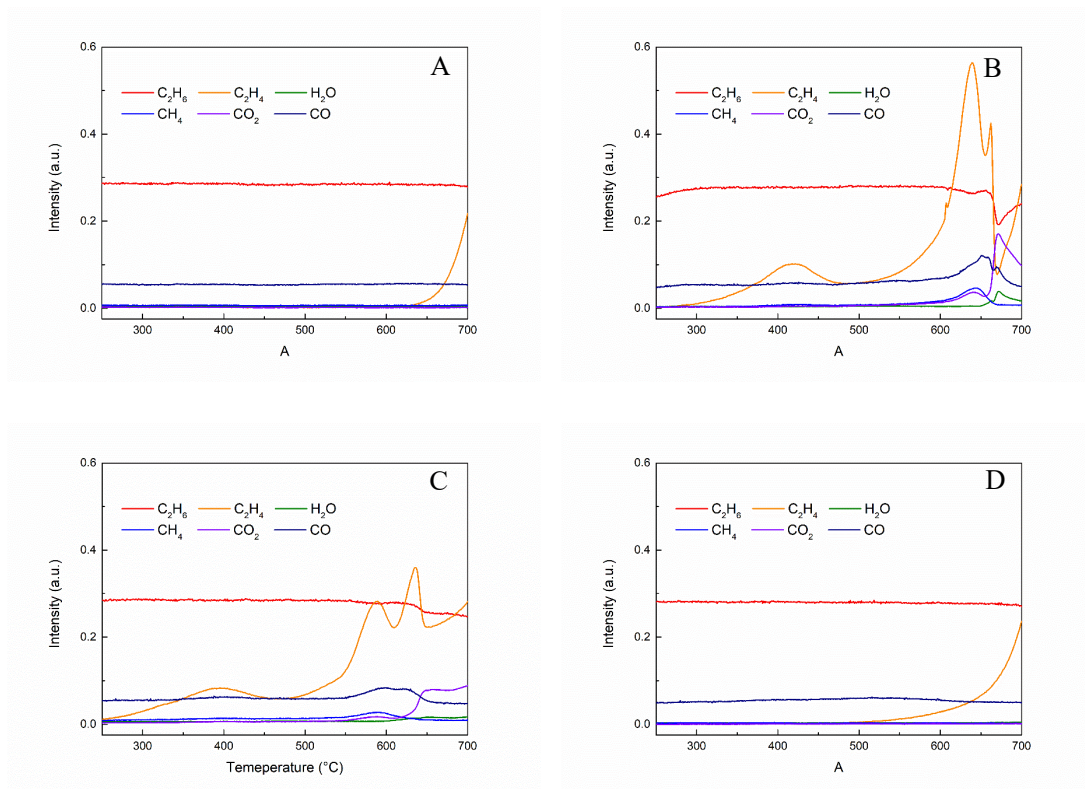

**Fig. S4**  $C_2H_6$ -TPSR profiles of (A) Empty, (B) M1, (C) M1/40TiO<sub>2</sub>, and (D) TiO<sub>2</sub> catalyst

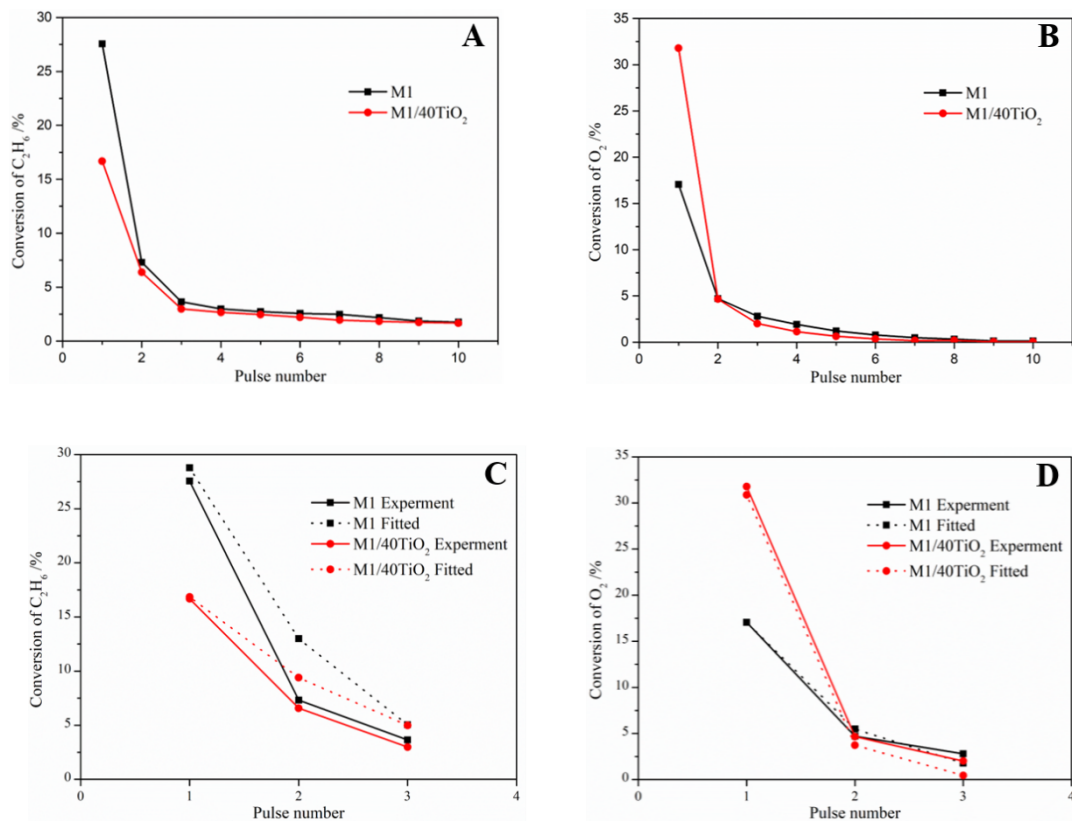

**Fig. S5** Conversion of ethane (A) and oxygen (B) pulse injection reaction, ethane (C) and oxygen (D) pulse injection reaction fitted results. (reaction condition: reaction temperature of 400 °C, rate of carrier gas 30 ml/min, mass of catalyst 20 mg, pulse gas 6.13  $\mu$ mol per time, pure  $C_2H_6$  or 50%/50%  $O_2/N_2$ , reaction pressure of 525 kPa)



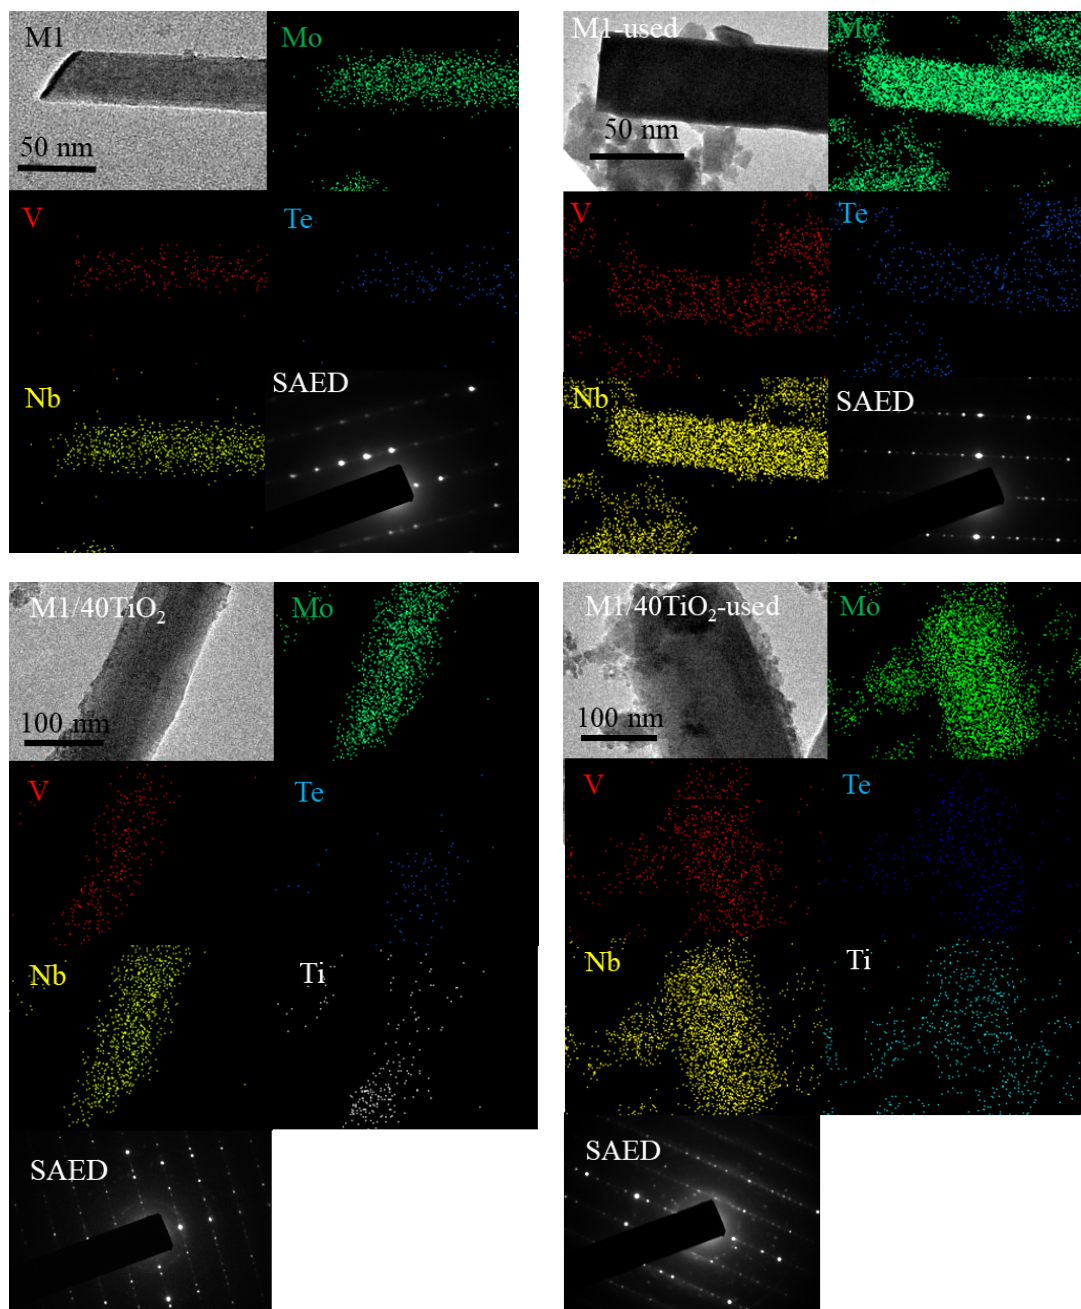

**Fig. S6** Elemental mapping images of Mo, V, Te, Nb, and Ti and corresponding selected area electron diffraction (SAED) patterns.

**Table S1** Catalytic performance of M1, M1\*, and M1/40TiO<sub>2</sub> for ODHE reaction <sup>a</sup>

| Catalyst |                       | C <sub>2</sub> H <sub>6</sub> conversion (%) | Products distribution (%)     |      |                 |
|----------|-----------------------|----------------------------------------------|-------------------------------|------|-----------------|
|          |                       |                                              | C <sub>2</sub> H <sub>4</sub> | CO   | CO <sub>2</sub> |
| 1        | M1                    | 23.3                                         | 94.8                          | 3.4  | 1.8             |
| 2        | M1*                   | 27.4                                         | 94.4                          | 3.6  | 2.0             |
| 3        | M1/40TiO <sub>2</sub> | 41.4                                         | 83.2                          | 11.9 | 4.9             |

<sup>a</sup> Reaction condition: reaction temperature T = 400 °C, contact time W/F= 18.52 g<sub>cat</sub>·h/mol<sub>C<sub>2</sub>H<sub>6</sub></sub>, ambient pressure, C<sub>2</sub>H<sub>6</sub>/O<sub>2</sub>/He (inlet) = 30/20/50 (6/4/10 NmL/min)

**Table S2** Parameter of M1 MoVNbTeO<sub>x</sub> <sup>S3</sup>

| Catalysts             | Lattice parameter (Å) |         |         | Particle Size (nm) |        | $N_{001}$ |
|-----------------------|-----------------------|---------|---------|--------------------|--------|-----------|
|                       | a                     | b       | c       | Width              | Length |           |
| MoVNbTeO <sub>x</sub> | 21.1337               | 26.6440 | 4.01415 | ~80                | ~200   | 6         |

**Table S3** Trend line intercepts and slopes of catalysts

| Catalysts             | Intercept % | Slope  |
|-----------------------|-------------|--------|
| M1                    | 97.31       | -0.142 |
| M1/10TiO <sub>2</sub> | 96.82       | -0.224 |
| M1/20TiO <sub>2</sub> | 97.38       | -0.289 |
| M1/30TiO <sub>2</sub> | 97.92       | -0.226 |
| M1/40TiO <sub>2</sub> | 97.15       | -0.334 |
| M1/50TiO <sub>2</sub> | 96.24       | -0.381 |

**Table S4** Lattice parameters of phase-pure M1 MoVNbTeO<sub>x</sub>/TiO<sub>2</sub> catalysts

| Catalyst                    | M1 lattice parameters <sup>a</sup> (Å) |         |        | TiO <sub>2</sub> d <sub>101</sub> (Å) <sup>b</sup> | TiO <sub>2</sub> <sup>c</sup> |
|-----------------------------|----------------------------------------|---------|--------|----------------------------------------------------|-------------------------------|
|                             | a                                      | b       | c      |                                                    | Particle size (nm)            |
| M1                          | 21.1801                                | 26.6342 | 4.0072 | -                                                  | -                             |
| used M1                     | 21.0239                                | 26.4554 | 4.0019 | -                                                  | -                             |
| M1/20TiO <sub>2</sub>       | 21.2172                                | 26.6369 | 4.0124 | 3.5328                                             | 13.68                         |
| used M1/20TiO <sub>2</sub>  | 21.2807                                | 26.8275 | 4.0225 | 3.5409                                             | 14.52                         |
| M1/40TiO <sub>2</sub>       | 21.1320                                | 26.7751 | 4.0107 | 3.5429                                             | 11.75                         |
| used M1/40 TiO <sub>2</sub> | 21.1143                                | 26.7834 | 4.0107 | 3.5283                                             | 14.78                         |
| M1/50TiO <sub>2</sub>       | 21.2553                                | 26.5977 | 4.0060 | 3.5225                                             | 11.87                         |
| used M1/50TiO <sub>2</sub>  | 21.1901                                | 26.6793 | 4.0123 | 3.5260                                             | 14.48                         |
| TiO <sub>2</sub>            | -                                      | -       | -      | 3.5613                                             | 14.49                         |
| used TiO <sub>2</sub>       | -                                      | -       | -      | 3.5162                                             | 16.56                         |

<sup>a</sup> Determined by fitting XRD patterns based on the M1 phase (ICSD 55097).

<sup>b</sup> Determined by fitting XRD patterns based on the anatase TiO<sub>2</sub> (JPDS 21-1272).

<sup>c</sup> Determined based on the half band width of peak at 25.4° in XRD patterns to calculate the average crystal size along the [1 0 1] crystal direction by Scherrer equation.

**Table S5** Textural characterization of the phase-pure M1 MoVNbTeO<sub>x</sub>/TiO<sub>2</sub> catalysts

| Catalysts                  | Specific surface area m <sup>2</sup> /g | Pore Volume cc/g |
|----------------------------|-----------------------------------------|------------------|
| M1                         | 17.7                                    | 0.060            |
| Used M1                    | 15.7                                    | 0.048            |
| M1/20TiO <sub>2</sub>      | 33.4                                    | 0.072            |
| Used M1/20TiO <sub>2</sub> | 31.0                                    | 0.069            |
| M1/40TiO <sub>2</sub>      | 52.4                                    | 0.085            |
| Used M1/40TiO <sub>2</sub> | 50.0                                    | 0.080            |
| TiO <sub>2</sub>           | 52.7                                    | 0.104            |
| Used TiO <sub>2</sub>      | 43.8                                    | 0.099            |

## Notes and references

- S1. A. I. Anastasov, Chemical Engineering Science, 2003, **58**, 89-98.
- S2. G. F. Froment, Chemie Ingenieur Technik - CIT, 1974, **46**, 374-386.
- S3. P. DeSanto, D. J. Buttrey, R. K. Grasselli, C. G. Lugmair, A. F. Volpe, B. H. Toby and T. Vogt, Z. Kristall., 2004, **219**, 152-165.
